# Supplementary material for: Development and assessment of interstitial brachytherapy using individual curved-needle in treatment of recurrent gynecological tumors after external beam radiotherapy
Source: Research Square preprint supplement (doi:10.21203/rs.3.rs-6728229/v1), 2025-07-01
Supplement: Supplementary file 1 [file 27fbdf87cc7156b6e5962a16.docx]

Table 4. Dosimetric parameters of brachytherapy in patients without radiation history.

| Parameters | Average per fraction (Gy) | Average cumulative EQD2 (Gy) |
| --- | --- | --- |
| CTV-B D100%[Gy] | 3.20±0.70 | 11.71±4.98 |
| CTV-B D98%[Gy] | 4.57±0.66 | 17.99±7.11 |
| CTV-B D90%[Gy] | 5.78±0.64 | 24.98±9.61 |
| CTV-B D50%[Gy] | 9.23±1.65 | 49.61±14.00 |
| Rectum D2cc[Gy] | 3.47±0.78 | 15.25±6.82 |
| Rectum D5cc[Gy] | 2.82±0.72 | 11.22±5.39 |
| Rectum D0.1cc[Gy] | 4.86±1.03 | 25.90±9.64 |
| Bladder D2cc[Gy] | 4.29±0.77 | 21.65±9.49 |
| Bladder 5cc[Gy] | 3.66±0.84 | 16.95±8.12 |
| Bladder D0.1cc[Gy] | 5.67±0.88 | 34.56±12.22 |
| Sigmoid D2cc[Gy] | 2.16±1.04 | 8.23±5.09 |
| Sigmoid D5cc[Gy] | 1.83±0.69 | 6.75±3.11 |
| Sigmoid D0.1cc[Gy] | 4.09±1.80 | 20.70±7.29 |

Data following normal distribution were described as mean±standard deviation. CTV-B, clinical target volume-brachytherapy. V100%, V200%, percentage of the volume receiving 100%, 200% of the prescription dose. D90%, D98%, D50%, dose delivered to 90%, 98%, or 50% of the target volume. D2cc, dose delivered to 2cc of the organs at risk. EQD2, equivalent total doses in 2-Gy fraction.
