# Supplementary material for: Development and assessment of interstitial brachytherapy using individual curved-needle in treatment of recurrent gynecological tumors after external beam radiotherapy
Source: Research Square preprint supplement (doi:10.21203/rs.3.rs-6728229/v1), 2025-07-01
Supplement: Supplementary file 2 [file 43bb0ff5e4d2c838892dad3b.docx]

Table 5. The acute and chronic toxicities of patients

| Adverse event | Grade 1 (N, %) | Grade 2 (N, %) | Grade 3 (N, %) | Grade 4 (N, %) |
| --- | --- | --- | --- | --- |
| Acute toxicities |  |  |  |  |
| Hematological toxicities | 0 | 5 (38.4%) | 3 (23.1%) | 0 |
| Gastrointestinal toxicities | 4 (30.8%) | 3 (23.1%) | 0 | 0 |
| Urinary toxicities | 1 (7.7%) | 0 | 1 (7.7%) | 0 |
| Genital toxicities | 3 (23.1%) | 0 | 0 | 0 |
| Chronic toxicities |  |  |  |  |
| Hematological toxicities | 0 | 2 (15.4%) | 0 | 0 |
| Gastrointestinal toxicities | 0 | 2 (15.4%) | 0 | 0 |
| Urinary toxicities | 3 (23.1%) | 1 (7.7%) | 0 | 0 |
| Genital toxicities | 0 | 0 | 1 (7.7%) | 0 |
