# Supplementary material for: Development and assessment of interstitial brachytherapy using individual curved-needle in treatment of recurrent gynecological tumors after external beam radiotherapy
Source: Research Square preprint supplement (doi:10.21203/rs.3.rs-6728229/v1), 2025-07-01
Supplement: Supplementary file 3 [file 57b557bd776f3259c0d06684.docx]

Table 1. Patients and primary tumor treatment characteristics

| Characteristics | Number | Percentage |
| --- | --- | --- |
| Median age (years old) | 53 (range 39-79) |  |
| Diagnosis |  |  |
| Cervical cancer | 9 | 69.2% |
| Endometrial cancer | 2 | 15.4% |
| Vaginal cancer | 1 | 7.7% |
| Endometrial sarcoma | 1 | 7.7% |
| Histology  Cervical |  |  |
| Squamous cell carcinoma | 7 | 53.8% |
| Adenocarcinoma | 2 | 15.4% |
| Endometrial |  |  |
| Adenocarcinoma | 2 | 15.4% |
| Sarcoma | 1 | 7.7% |
| Vaginal |  |  |
| Squamous cell carcinoma | 1 | 7.7% |
| FIGO Stage |  |  |
| I | 5 | 38.5% |
| II | 2 | 15.4% |
| III | 4 | 30.8% |
| IV | 0 | 0 |
| Unknown | 1 | 7.7% |
| Surgery |  |  |
| Yes | 9 | 69.2% |
| No | 4 | 30.8% |
| Systemic therapy |  |  |
| Yes | 5 | 38.5% |
| No | 8 | 61.5% |
| Radiotherapy |  |  |
| Yes | 4 | 30.8% |
| No | 9 | 69.2% |

FIGO, International Federation of Gynecology and Obstetrics
