# Supplementary material for: Development and assessment of interstitial brachytherapy using individual curved-needle in treatment of recurrent gynecological tumors after external beam radiotherapy
Source: Research Square preprint supplement (doi:10.21203/rs.3.rs-6728229/v1), 2025-07-01
Supplement: Supplementary file 4 [file 92104087370c1f4596945e04.docx]

Table 3. Dosimetric parameters of brachytherapy in patients with radiation history.

| Parameters | Average per fraction (Gy) | Average cumulative EQD2 (Gy) |
| --- | --- | --- |
| CTV-B D100%[Gy] | 3.33±0.59 | 10.96±3.79 |
| CTV-B D98%[Gy] | 4.40±0.69 | 17.22±5.00 |
| CTV-B D90%[Gy] | 5.61±0.67 | 22.90±6.04 |
| CTV-B D50%[Gy] | 9.23±1.04 | 48.61±14.93 |
| Rectum D2cc[Gy] | 3.28±1.08 | 13.23±2.81 |
| Rectum D5cc[Gy] | 2.65±0.89 | 10.08±2.38 |
| Rectum D0.1cc[Gy] | 4.79±1.44 | 20.76±2.86 |
| Bladder D2cc[Gy] | 4.50±1.18 | 19.75±8.92 |
| Bladder 5cc[Gy] | 3.90±1.06 | 15.69±7.05 |
| Bladder D0.1cc[Gy] | 5.63±1.43 | 28.73±13.84 |
| Sigmoid D2cc[Gy] | 2.68±1.02 | 9.09±5.85 |
| Sigmoid D5cc[Gy] | 2.16±0.86 | 6.57±4.38 |
| Sigmoid D0.1cc[Gy] | 3.74±1.33 | 15.97±8.76 |

Data following normal distribution were described as mean±standard deviation. CTV-B, clinical target volume-brachytherapy. V100%, V200%, percentage of the volume receiving 100%, 200% of the prescription dose. D90%, D98%, D50%, dose delivered to 90%, 98%, or 50% of the target volume. D2cc, dose delivered to 2cc of the organs at risk. EQD2, equivalent total doses in 2-Gy fraction.
