# Supplementary material for: Development and assessment of interstitial brachytherapy using individual curved-needle in treatment of recurrent gynecological tumors after external beam radiotherapy
Source: Research Square preprint supplement (doi:10.21203/rs.3.rs-6728229/v1), 2025-07-01
Supplement: Supplementary file 6 [file b74858cdb9313555b8b687fd.docx]

Table 2. Recurrent gynecological cancer treatment characteristics

| Characteristics | Number | Percentage |
| --- | --- | --- |
| Recurrence free interval (months) | 29 (range 5–420) |  |
| Recurrence type |  |  |
| Central pelvic recurrence | 6 | 46.2% |
| Noncentral pelvic recurrence | 7 | 53.8% |
| Tumor size at recurrence(cm) |  |  |
| ≤4 | 10 | 76.9% |
| >4 | 3 | 23.1% |
| Systemic therapy |  |  |
| Concurrent systemic therapy | 7 | 53.8% |
| Maintenance systemic therapy | 1 | 7.7% |
| No | 5 | 38.5% |
| Systemic therapy agent |  |  |
| Cisplatin | 6 | 46.2% |
| Cisplatin-Paclitaxel | 1 | 7.7% |
| Carboplatin-paclitaxel | 1 | 7.7% |
| Targeted therapy | 1 | 7.7% |
| Immunotherapy | 1 | 7.7% |
| Image guidance technique during  Brachytherapy |  |  |
| CT guided | 12 | 92.3% |
| MRI guided | 1 | 7.7% |
| Median external-beam radiation dose (Gy) (IQR) | 45 (45, 50.4) |  |
| Median brachytherapy dose (Gy) (IQR) | 20 (13.5, 23.5) |  |

CT, computed tomography; MRI, magnetic resonance imaging; IQR, interquartile range.
